# Supplementary material for: Case characteristics among Middle East respiratory syndrome coronavirus outbreak and non-outbreak cases in Saudi Arabia from 2012 to 2015
Source: PubMed Central journal article supplement — BMJ Open. 2017 Jan 12;7(1):e011865. doi: 10.1136/bmjopen-2016-011865 (PMC5253590; doi:10.1136/bmjopen-2016-011865), 2017-01-12
Supplement: bmjopen-2016-011865supp_table.pdf [file bmjopen-2016-011865supp_table.pdf]

**Supplementary Table 1**

| <b>Nationality</b>          | <b>Frequency</b> | <b>Percent</b> |
|-----------------------------|------------------|----------------|
| <b>Saudi Arabia</b>         | 793              | 66.25          |
| <b>Philippines</b>          | 131              | 10.94          |
| <b>India</b>                | 47               | 3.93           |
| <b>Yemen</b>                | 44               | 3.68           |
| <b>Egypt</b>                | 33               | 2.76           |
| <b>Syrian Arab Republic</b> | 24               | 2.01           |
| <b>Sudan</b>                | 22               | 1.84           |
| <b>Bangladesh</b>           | 19               | 1.59           |
| <b>Pakistan</b>             | 18               | 1.50           |
| <b>Palestine</b>            | 18               | 1.50           |
| <b>Jordan</b>               | 7                | 0.58           |
| <b>Indonesia</b>            | 6                | 0.50           |
| <b>Malaysia</b>             | 6                | 0.50           |
| <b>Myanmar</b>              | 5                | 0.42           |
| <b>Lebanon</b>              | 4                | 0.33           |
| <b>Eritrea</b>              | 3                | 0.25           |
| <b>South Africa</b>         | 3                | 0.25           |
| <b>Somalia</b>              | 2                | 0.17           |
| <b>United States</b>        | 2                | 0.17           |
| <b>Australia</b>            | 1                | 0.08           |
| <b>Azerbaijan</b>           | 1                | 0.08           |
| <b>Chad</b>                 | 1                | 0.08           |
| <b>Ethiopia</b>             | 1                | 0.08           |
| <b>Kuwait</b>               | 1                | 0.08           |
| <b>Morocco</b>              | 1                | 0.08           |
| <b>Sri Lanka</b>            | 1                | 0.08           |
| <b>Tunisia</b>              | 1                | 0.08           |
| <b>Turkey</b>               | 1                | 0.08           |
| <b>United Kingdom</b>       | 1                | 0.08           |
